# Supplementary material
Source: Springer Nature journal article supplement (https://www.springermedizin.de/resource/supplementary/12955_2008_471_MOESM6_ESM.pdf/9560526)

# Stool Mucus

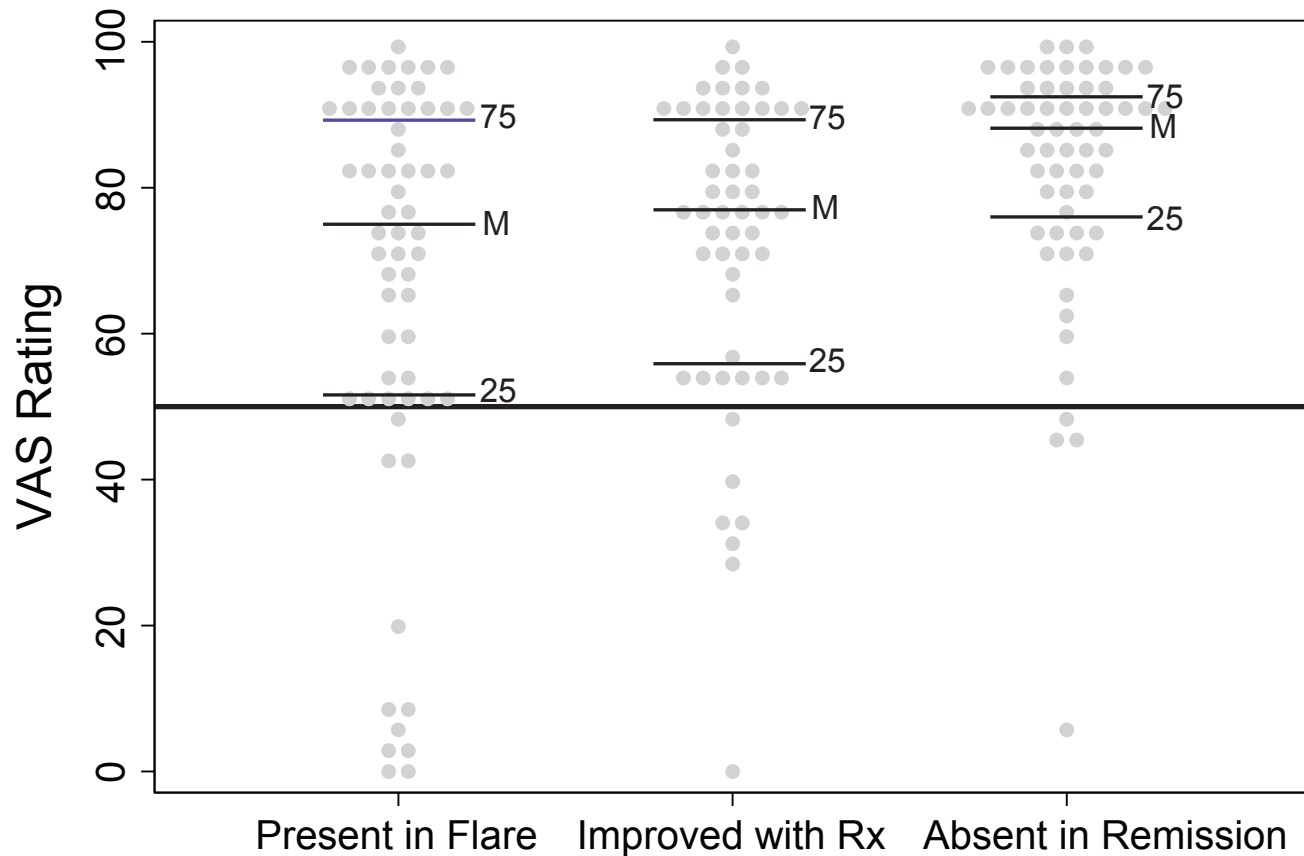

Supplement: MOESM6 [file 9560526]
